# Supplementary material for: A new platform for the synthesis of diketopyrrolopyrrole derivatives via nucleophilic aromatic substitution reactions
Source: publisher site journal article supplement (doi:10.3762/bjoc.20.169), 2024-08-08

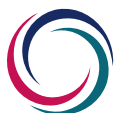

## Supporting Information

for

### **A new platform for the synthesis of diketopyrrolopyrrole derivatives via nucleophilic aromatic substitution reactions**

Vitor A. S. Almodovar and Augusto C. Tomé

*Beilstein J. Org. Chem.* **2024**, *20*, 1933–1939. [doi:10.3762/bjoc.20.169](https://doi.org/10.3762/bjoc.20.169)

**$^1\text{H}$  NMR,  $^{13}\text{C}$  NMR and  $^{19}\text{F}$  NMR spectra; MS, UV–vis and emission spectra**

# Compound 2

## <sup>1</sup>H NMR spectrum of 2

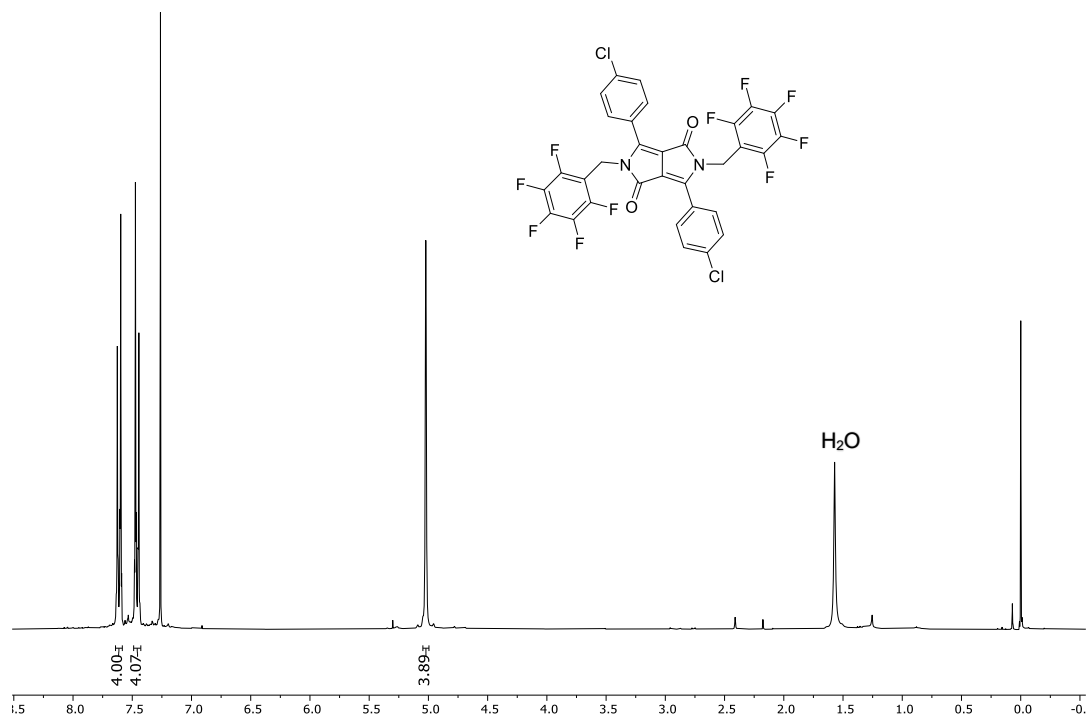

**<sup>19</sup>F NMR spectrum of 2**

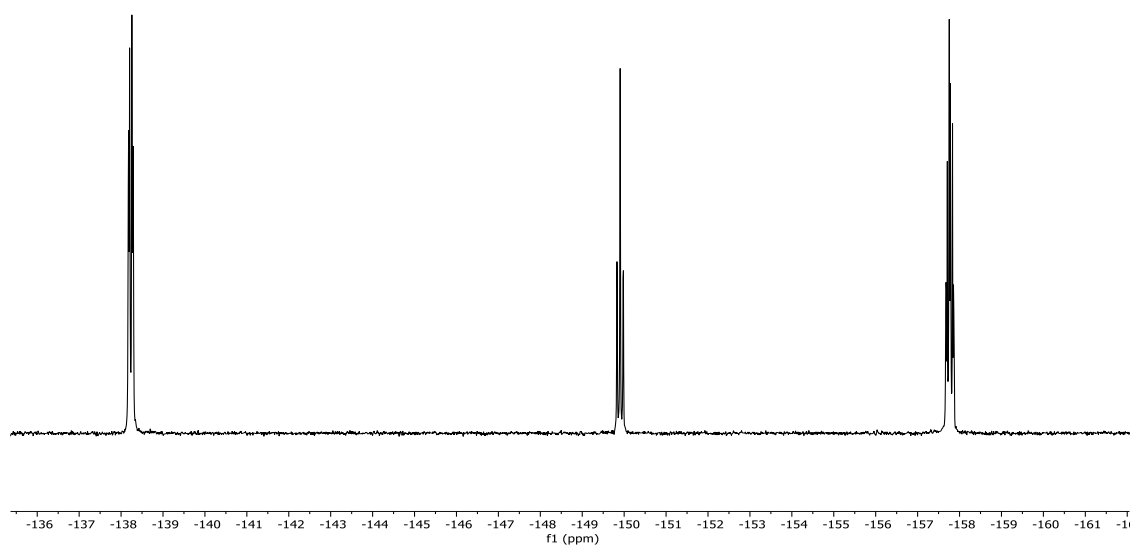

**<sup>13</sup>C NMR spectrum of 2**

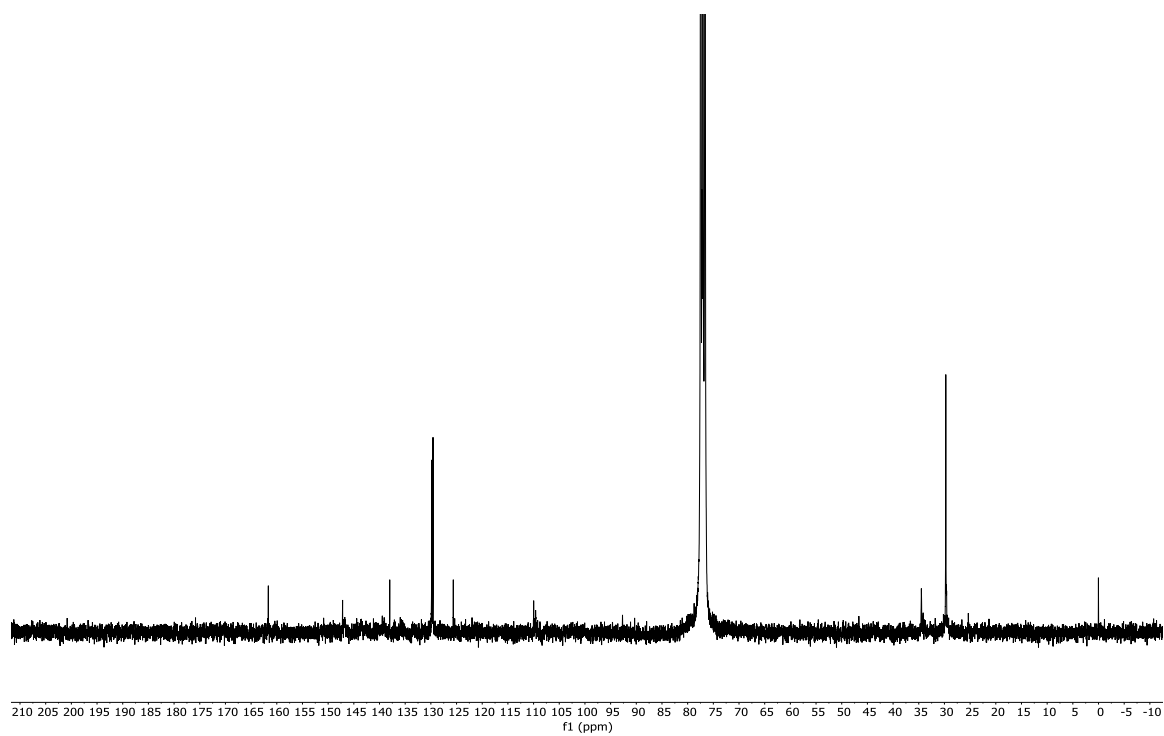

# Compound 3a

## <sup>1</sup>H NMR spectrum of 3a

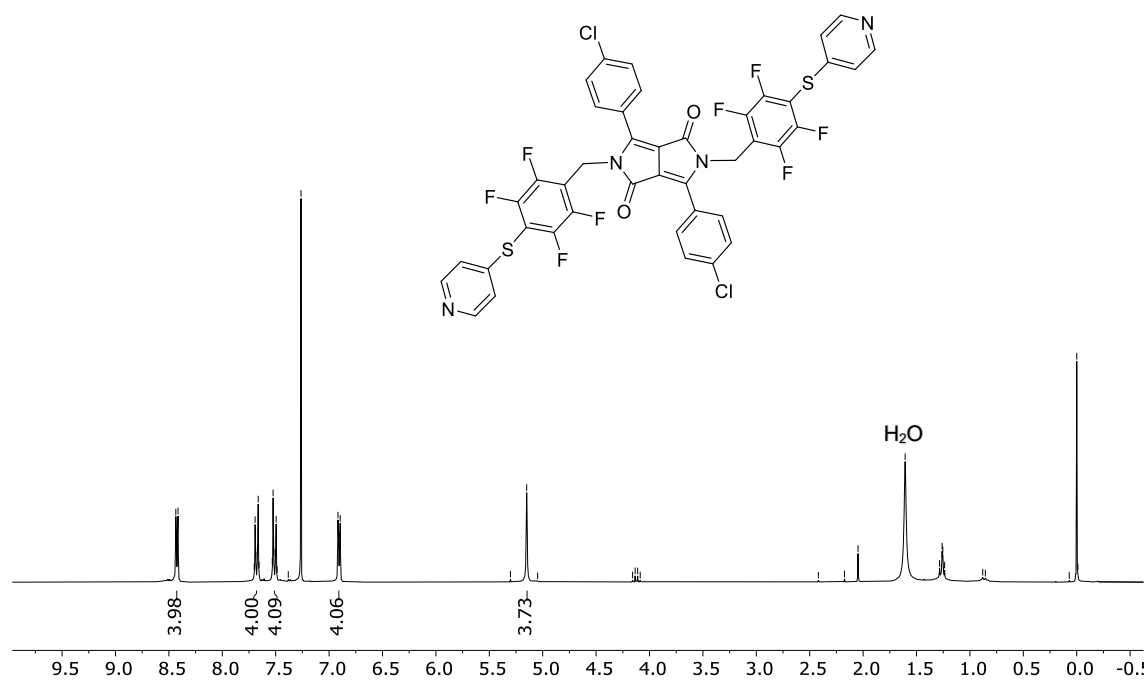

## <sup>19</sup>F NMR spectrum of 3a

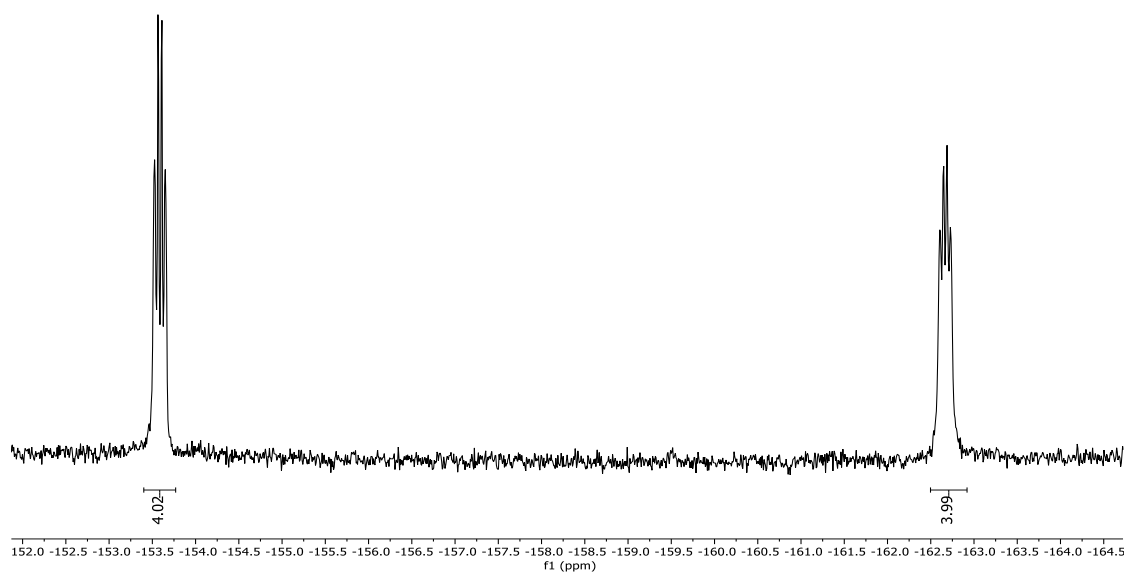

### Mass spectrum of 3a

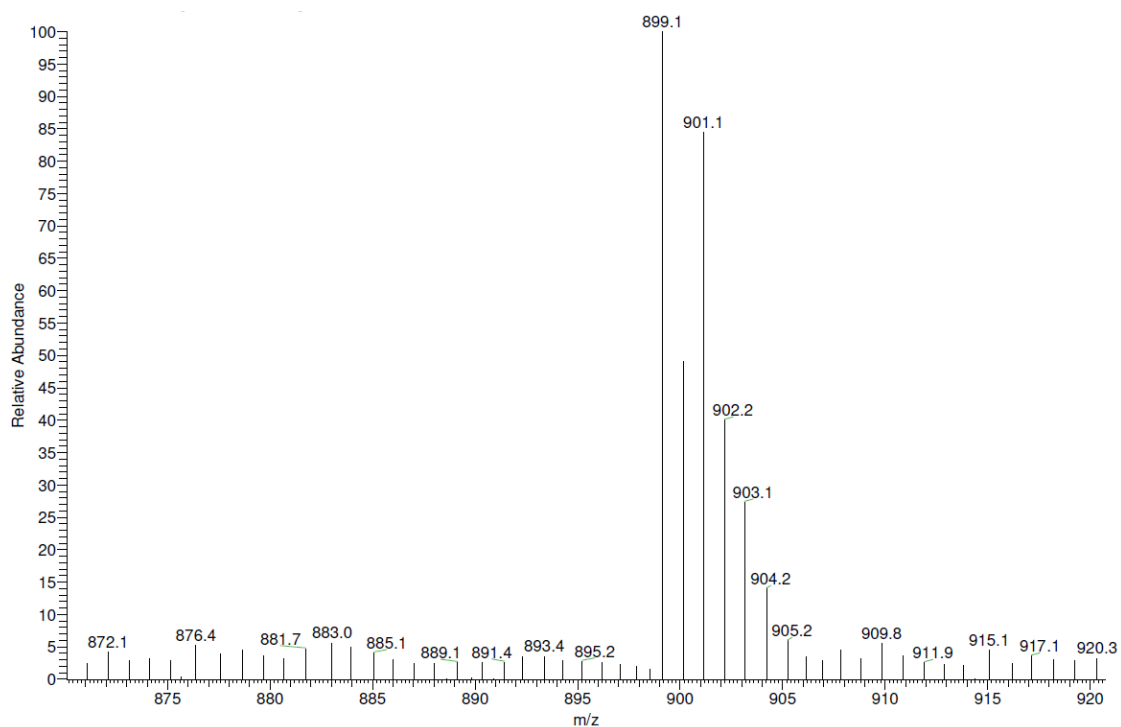

### UV-vis and fluorescence spectra of 3a

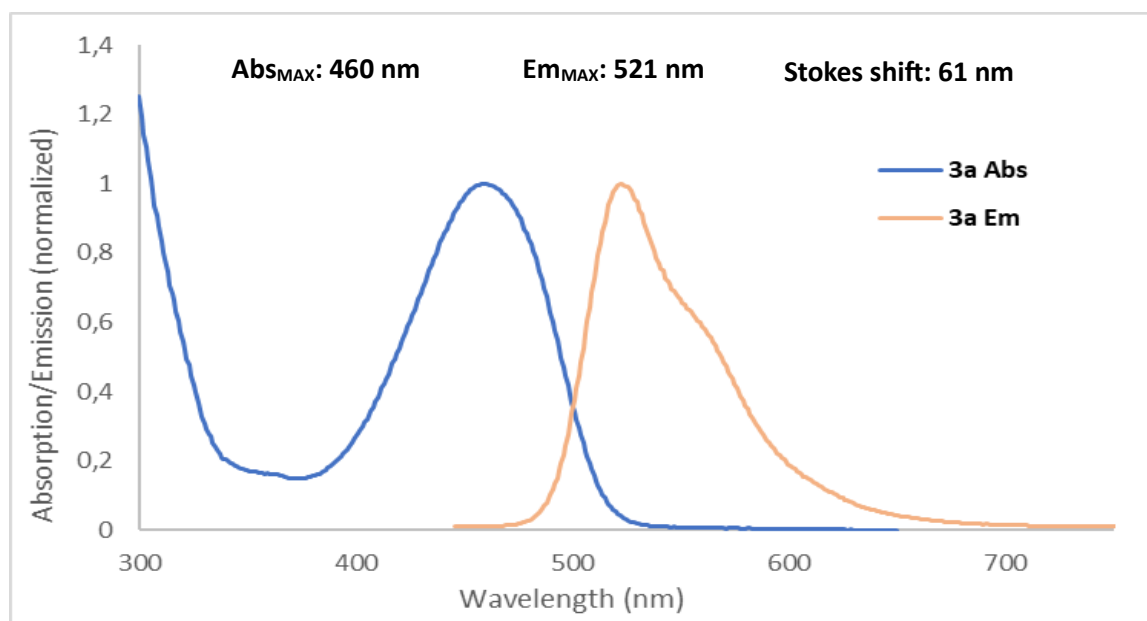

# Compound 4a

## <sup>1</sup>H NMR spectrum of 4a

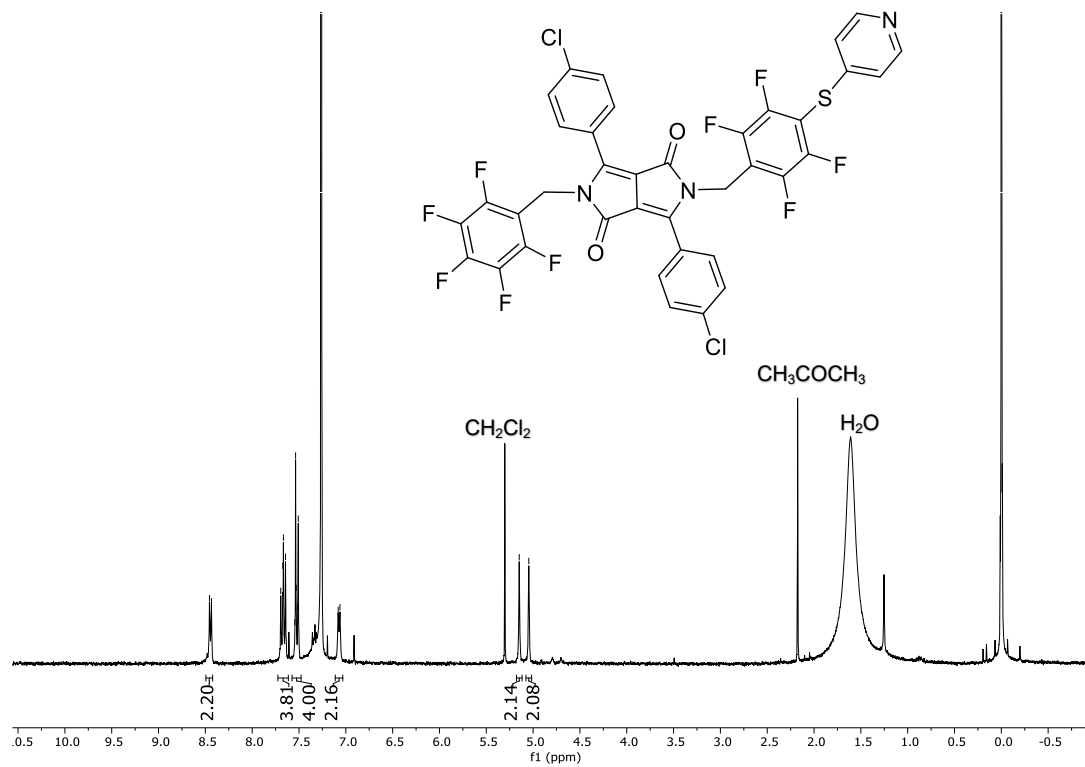

## <sup>13</sup>C NMR spectrum of 4a

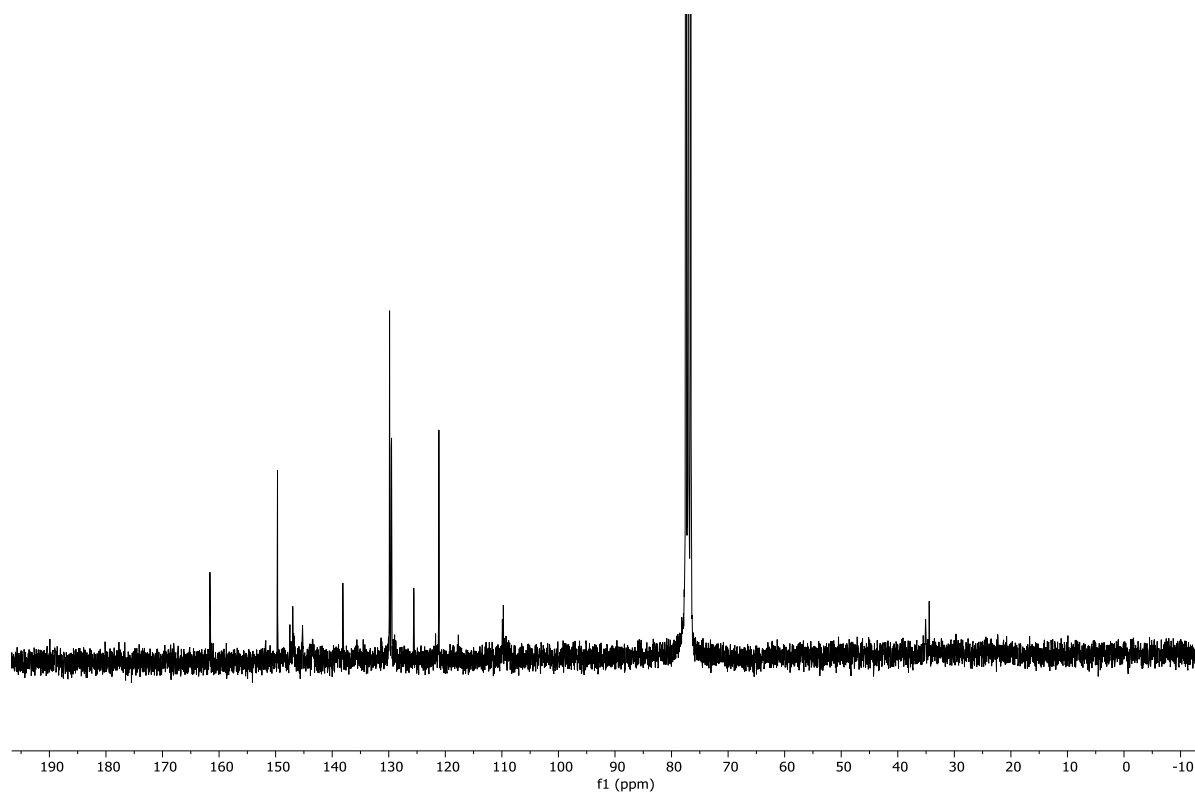

### <sup>19</sup>F NMR spectrum of 4a

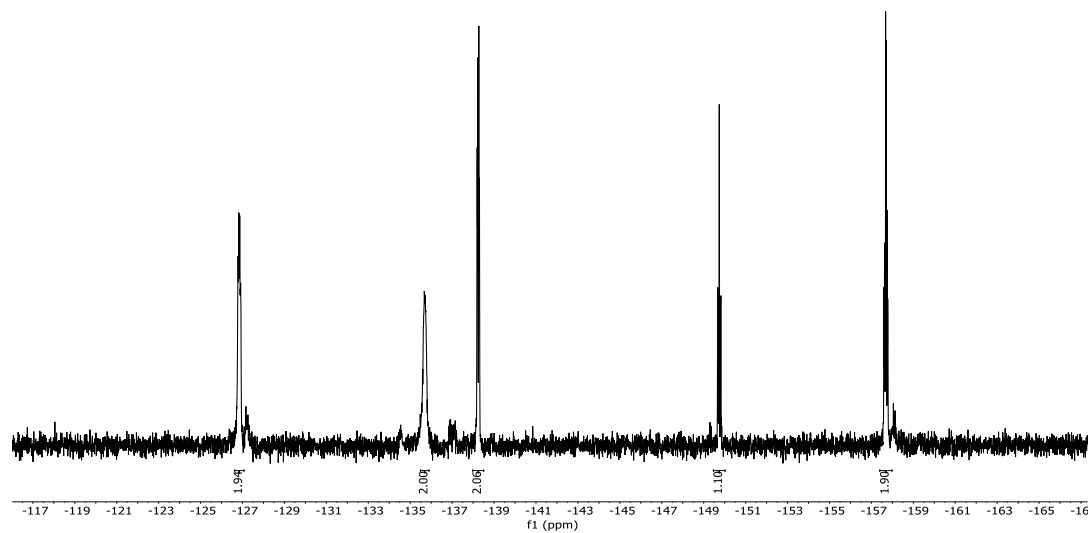

### Mass spectrum of 4a

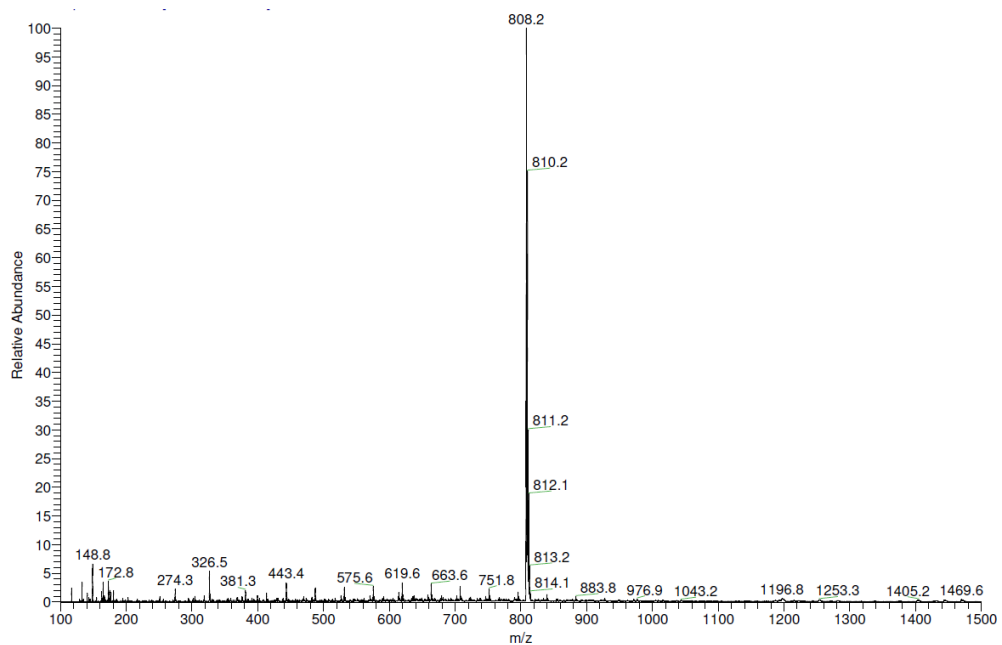

## UV-vis and fluorescence spectra of 4a

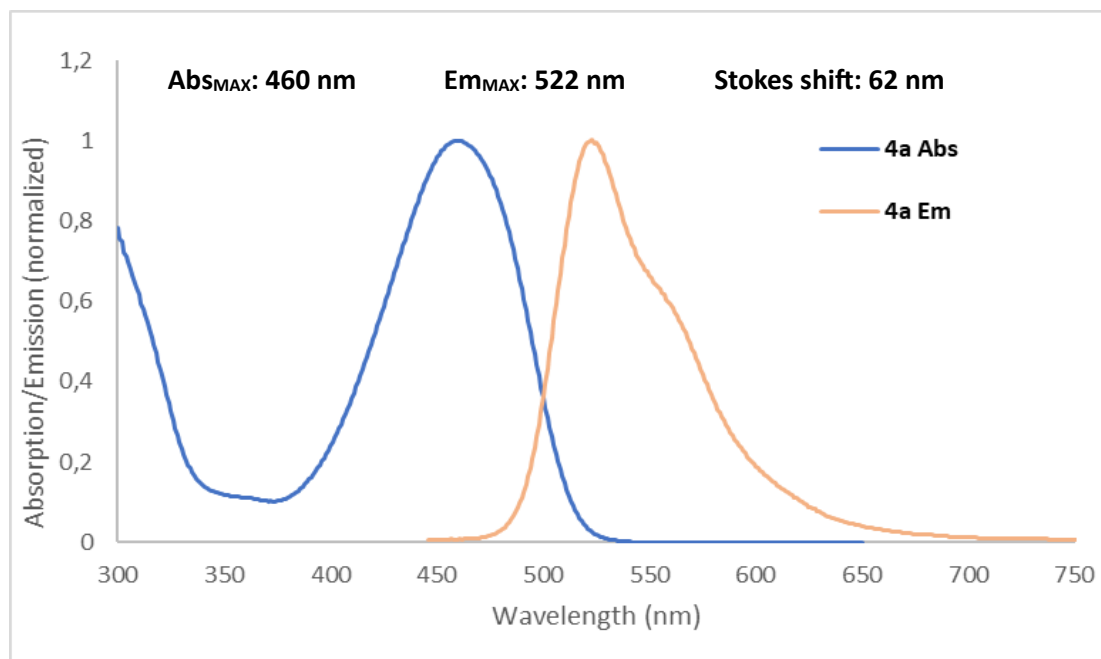

## Compound 3b

### <sup>1</sup>H NMR spectrum of 3b

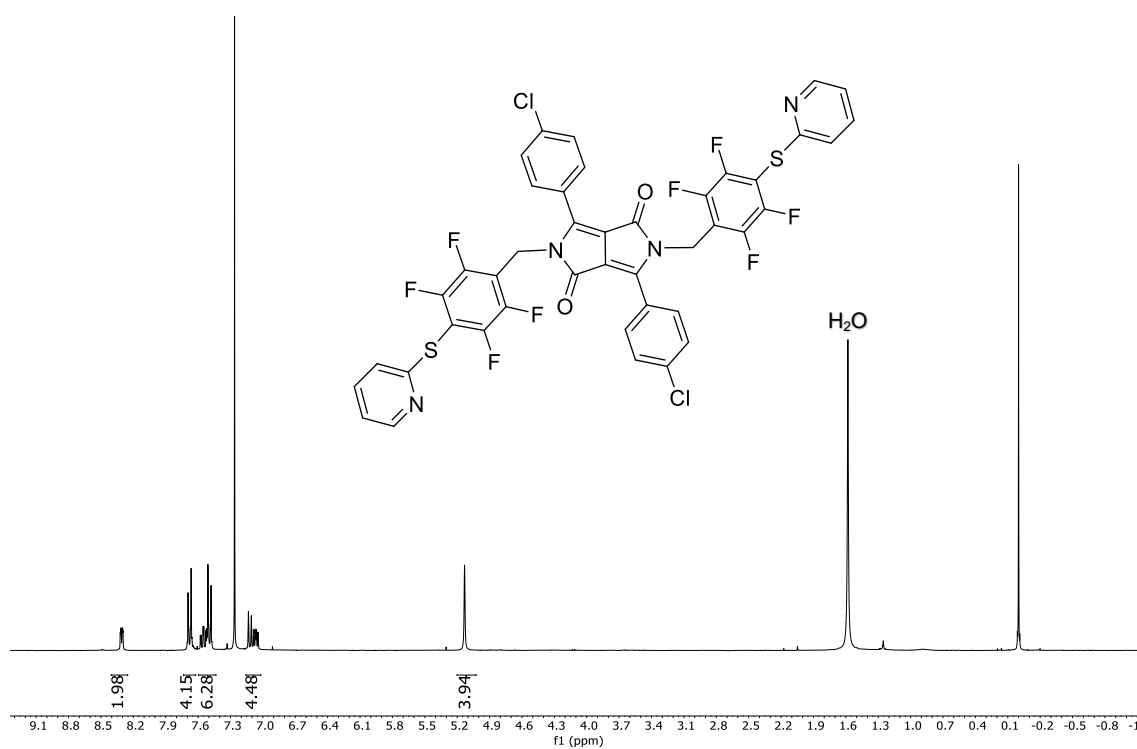



**<sup>13</sup>C NMR spectrum of 3b**

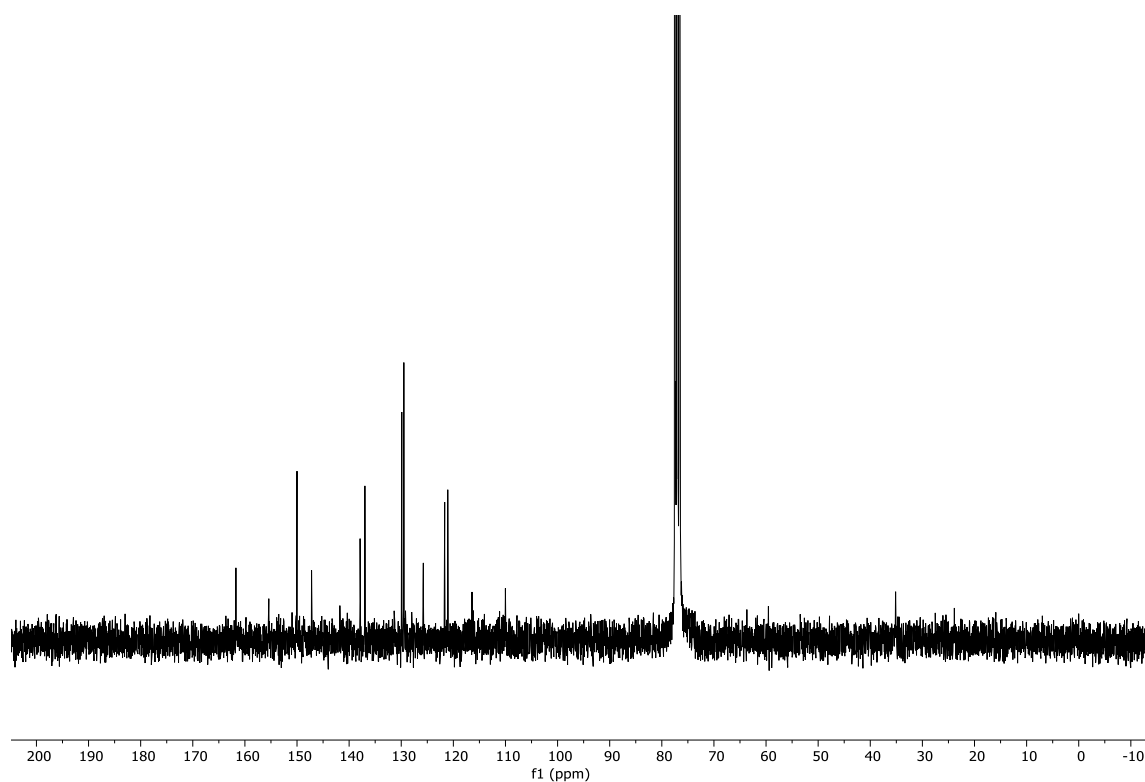

**<sup>19</sup>F NMR spectrum of 3b**

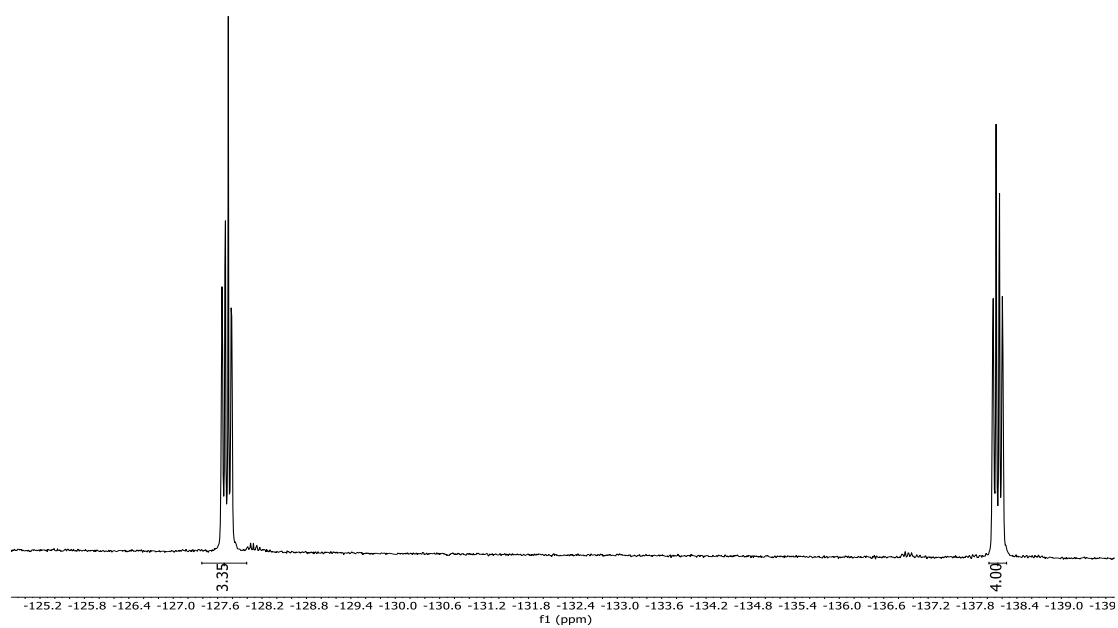

## Mass spectrum of 3b

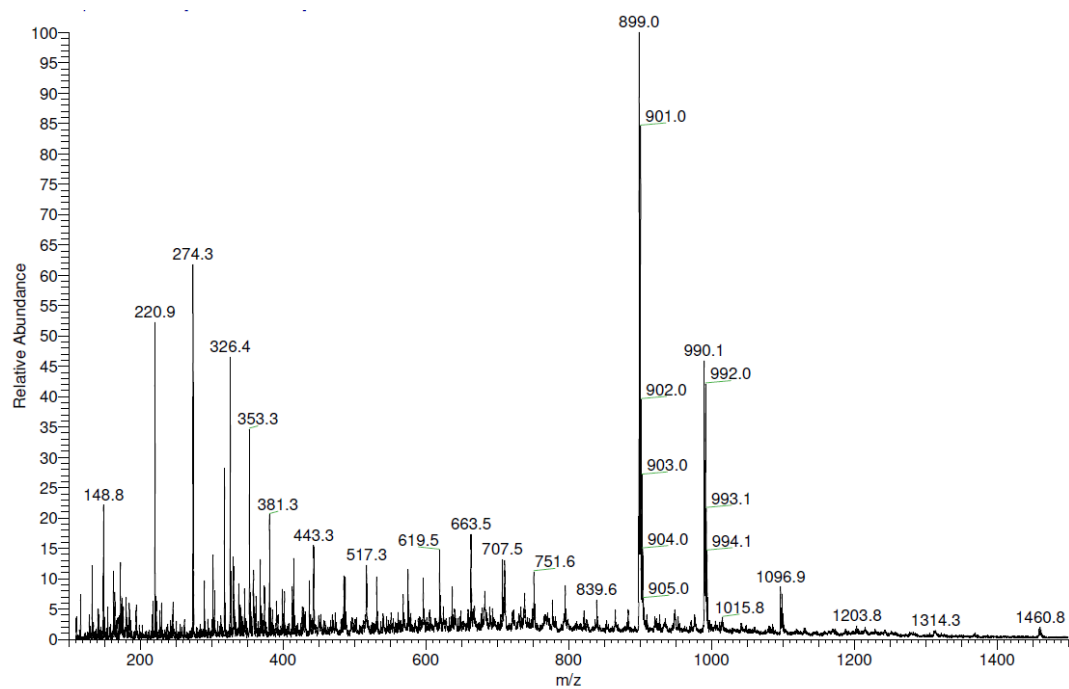

## UV-vis and fluorescence spectra of 3b

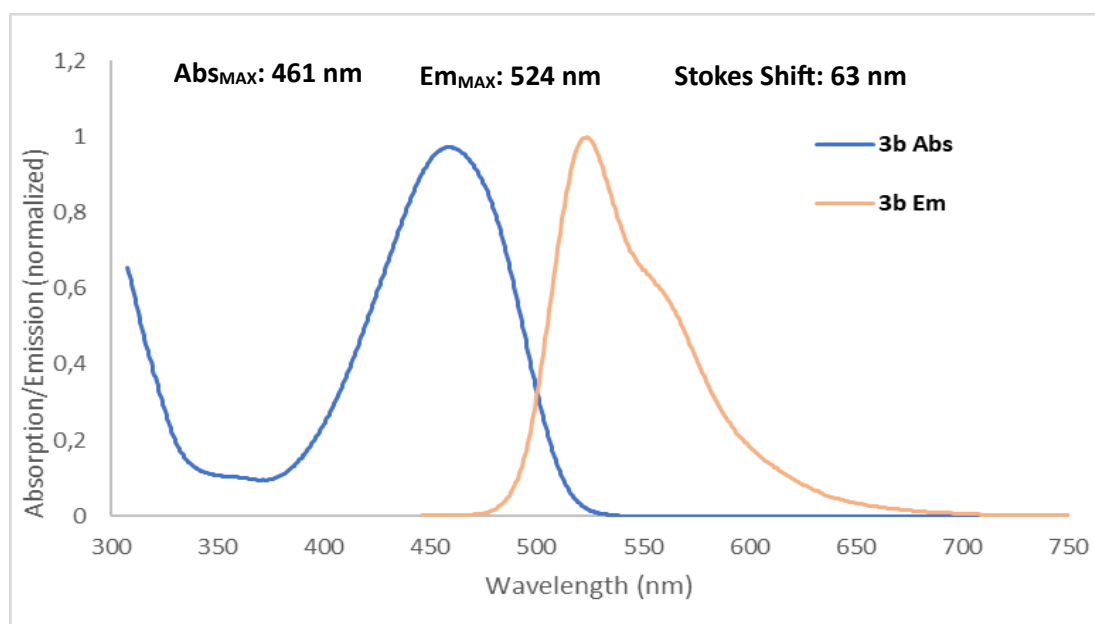

# Compound 3c

## <sup>1</sup>H NMR spectrum of 3c

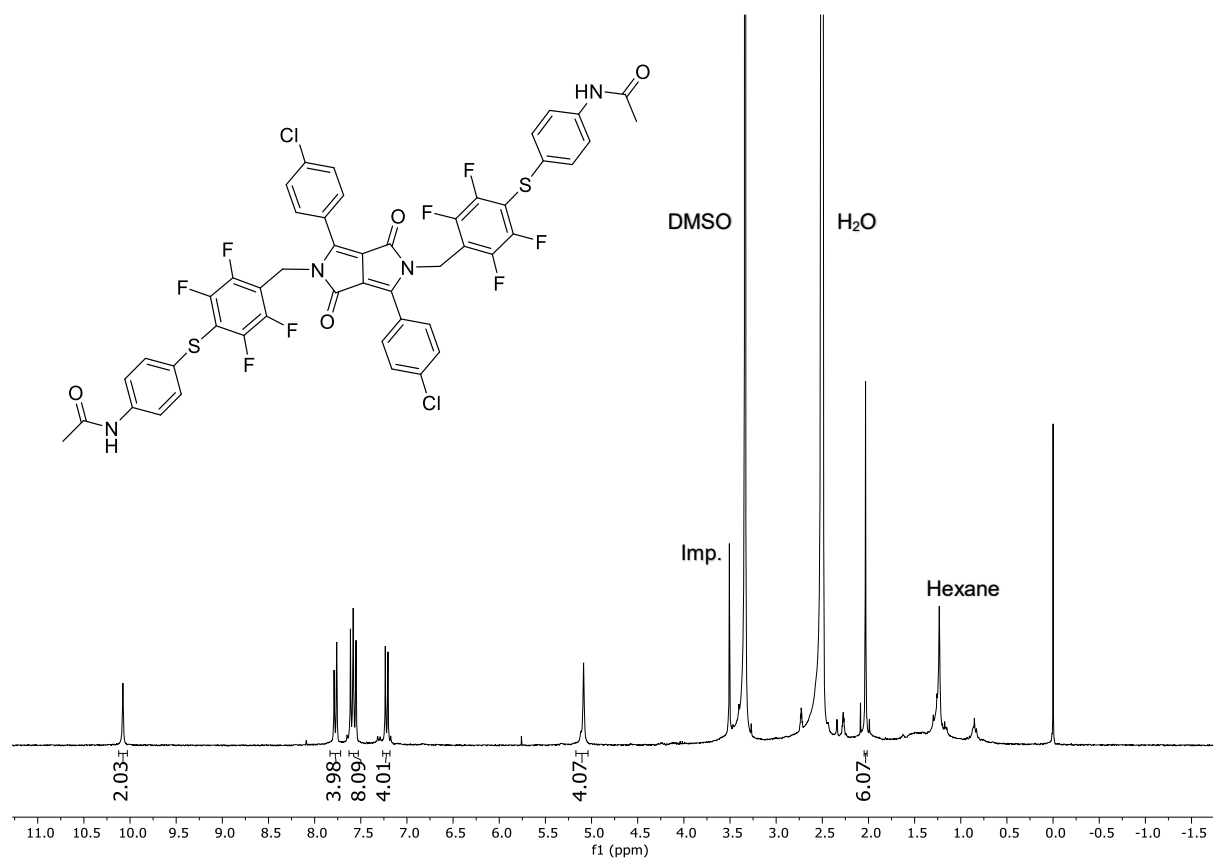

## <sup>13</sup>C NMR spectrum of 3c

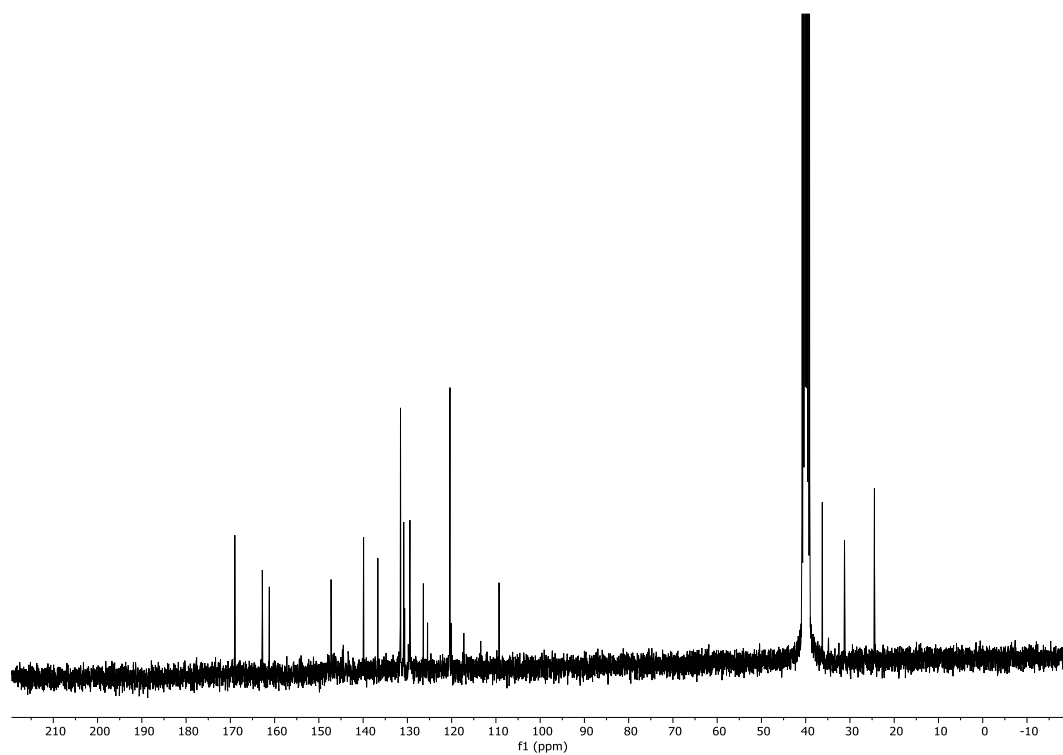

### <sup>19</sup>F NMR spectrum of 3c

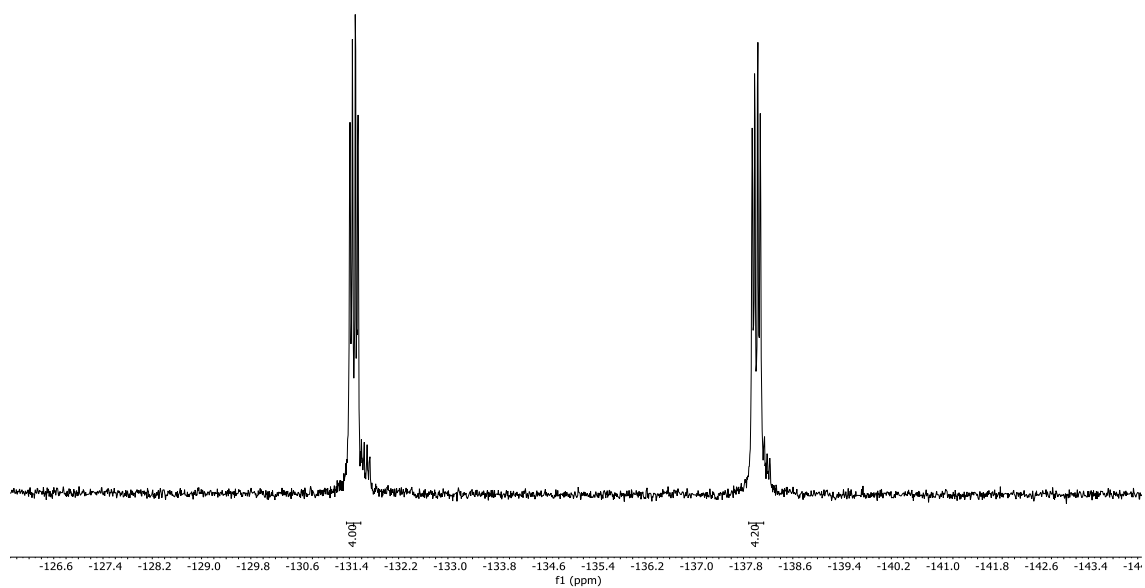

### Mass spectrum of 3c

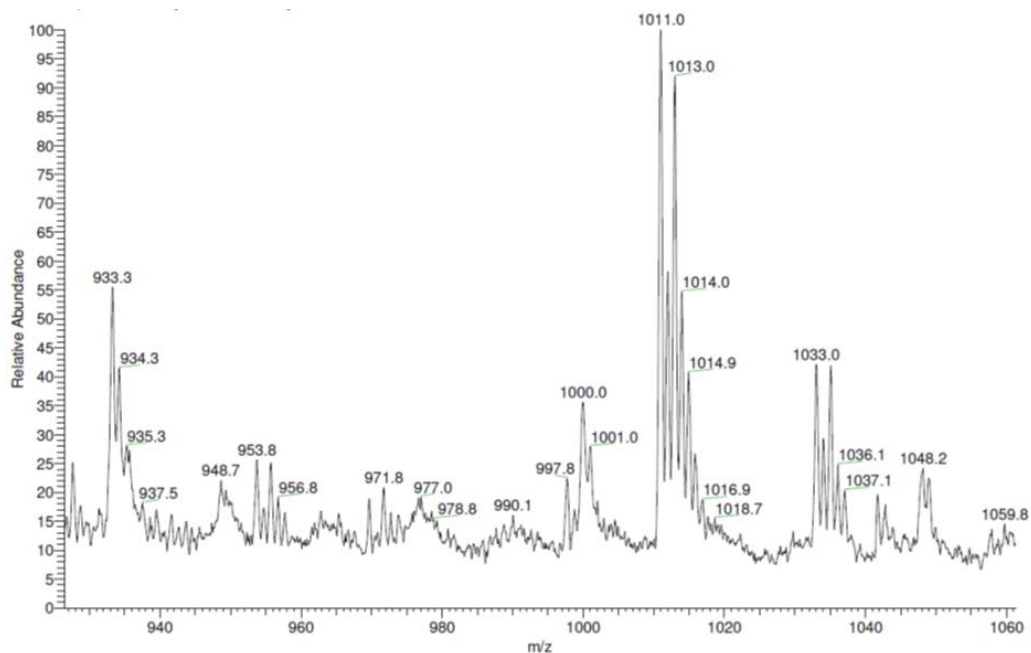

## UV-vis and fluorescence spectra of 3c

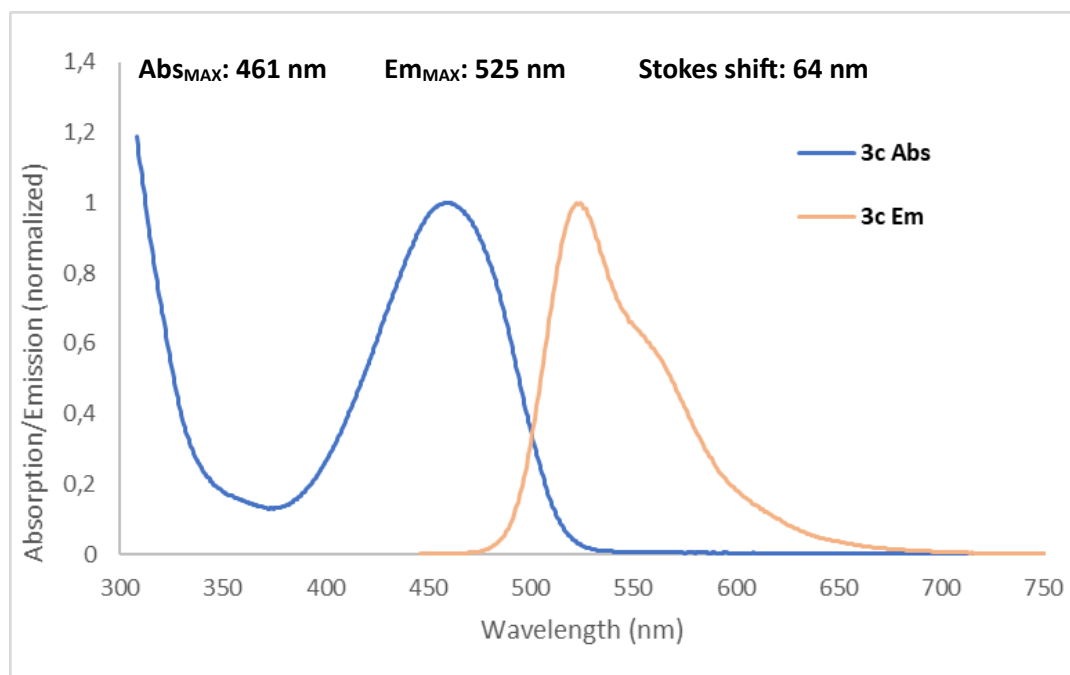

## Compound 3d

### <sup>1</sup>H NMR spectrum of 3d

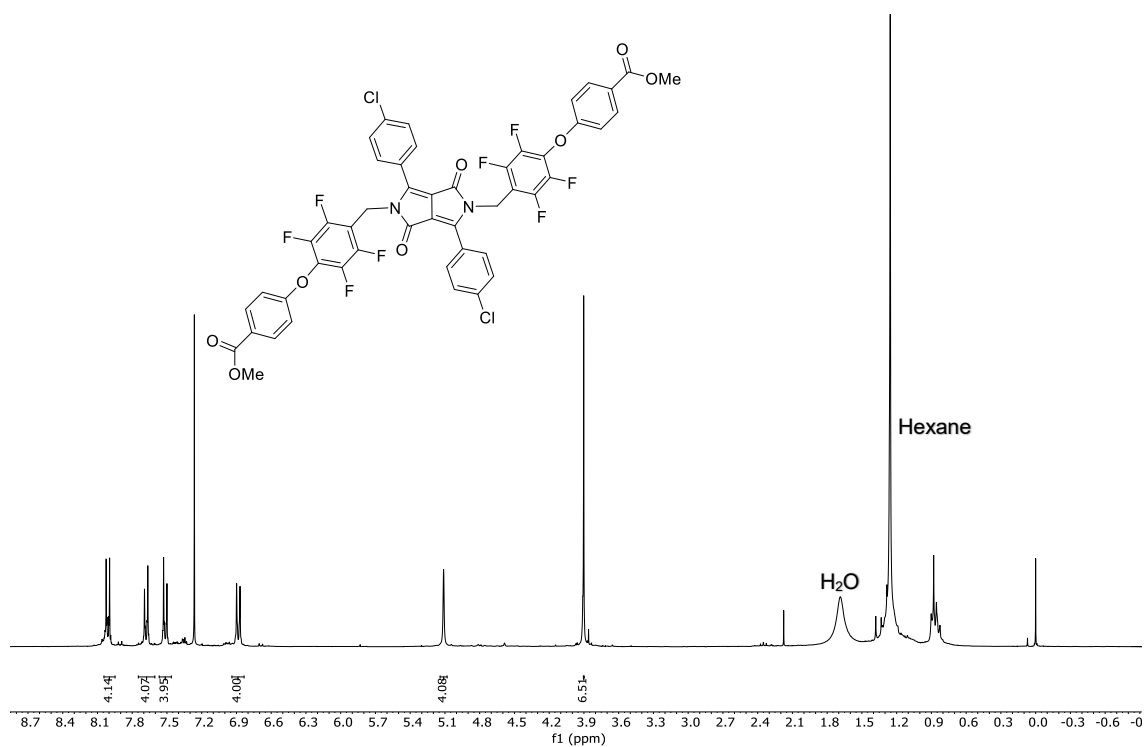

### <sup>19</sup>F NMR spectrum of 3d

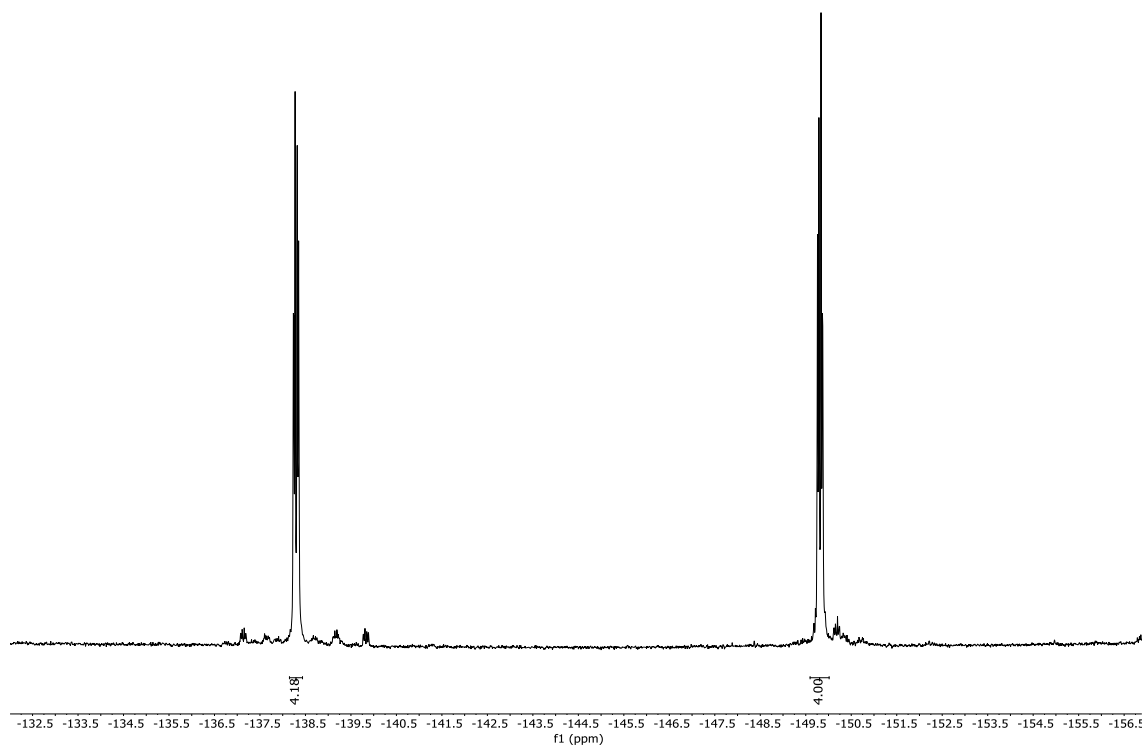

### UV-vis and fluorescence spectra of 3d

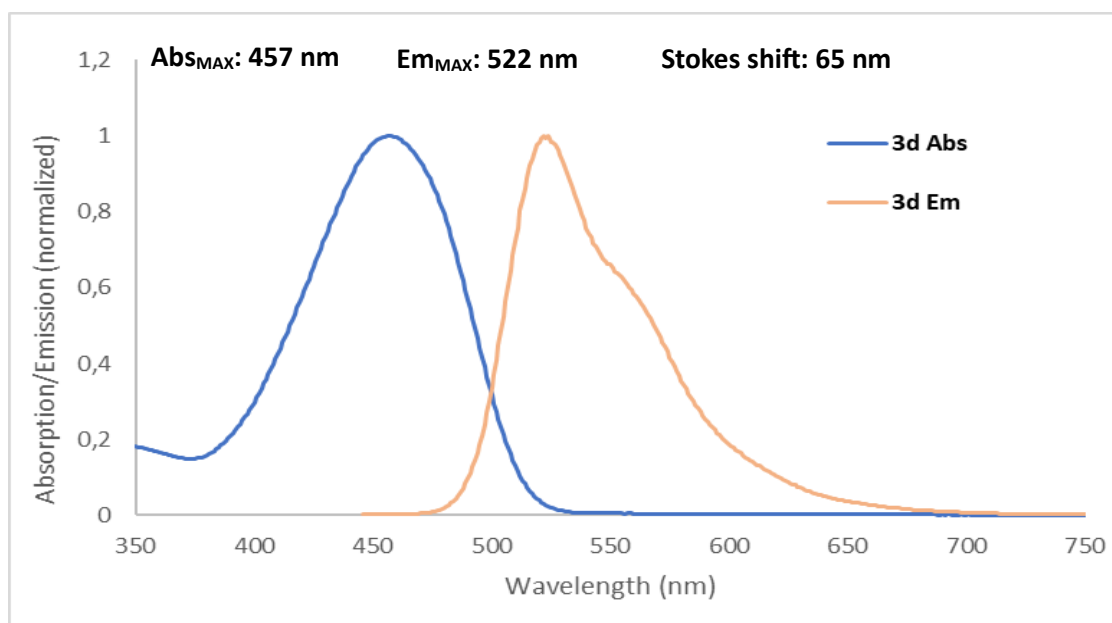

# Compound 4d

## <sup>1</sup>H NMR spectrum of 4d

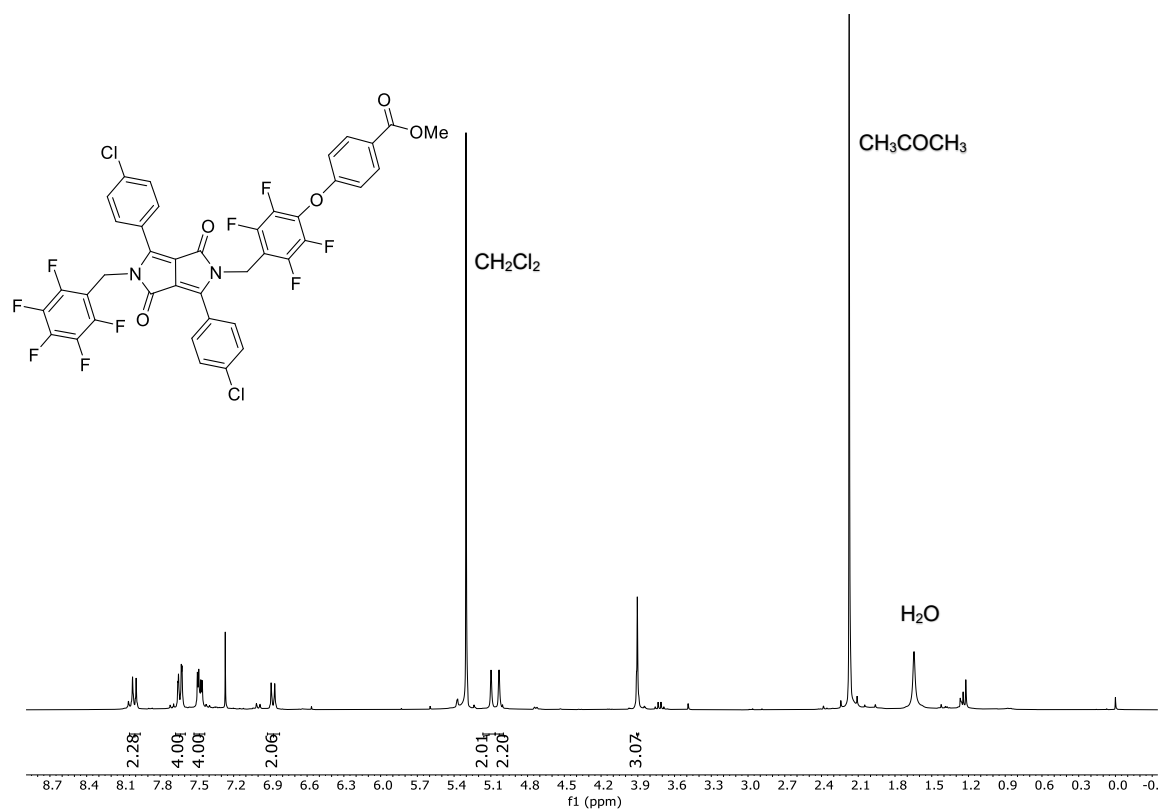

## <sup>19</sup>F NMR spectrum of 4d

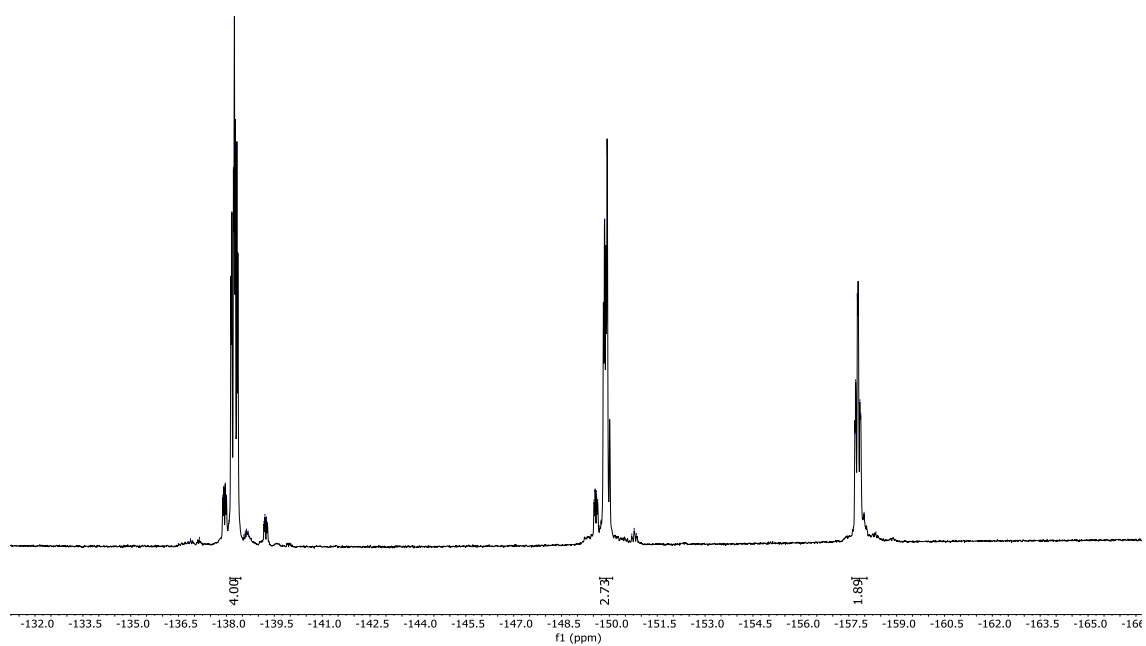

### Mass spectrum of 4d

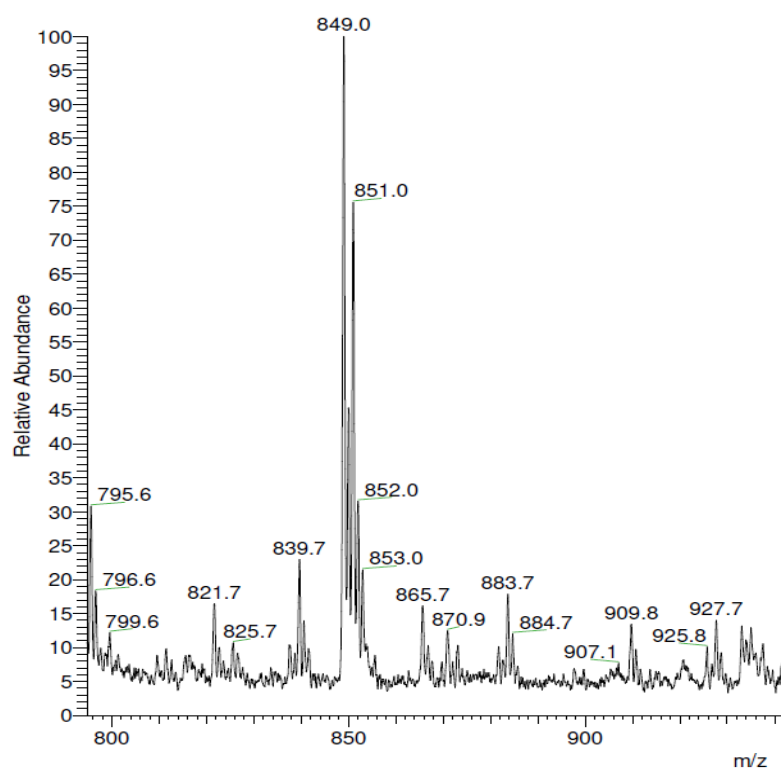

### UV-vis and fluorescence spectra of 4d

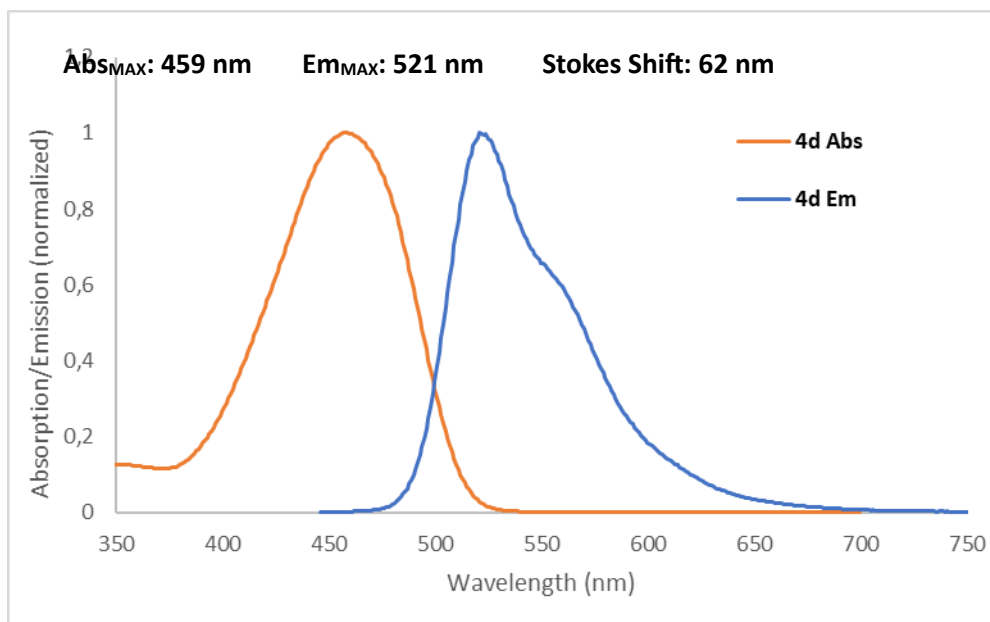



# Compound 3e

## <sup>1</sup>H NMR spectrum of 3e

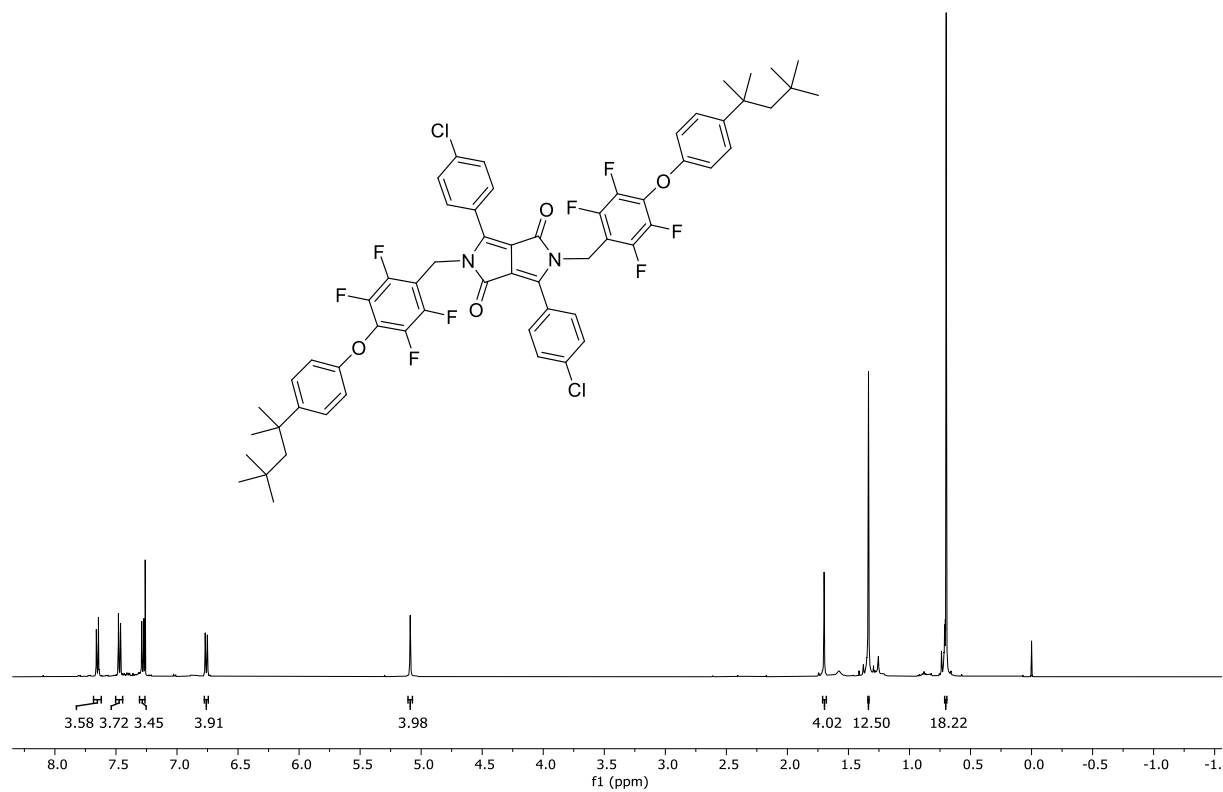

## <sup>13</sup>C NMR spectrum of 3e

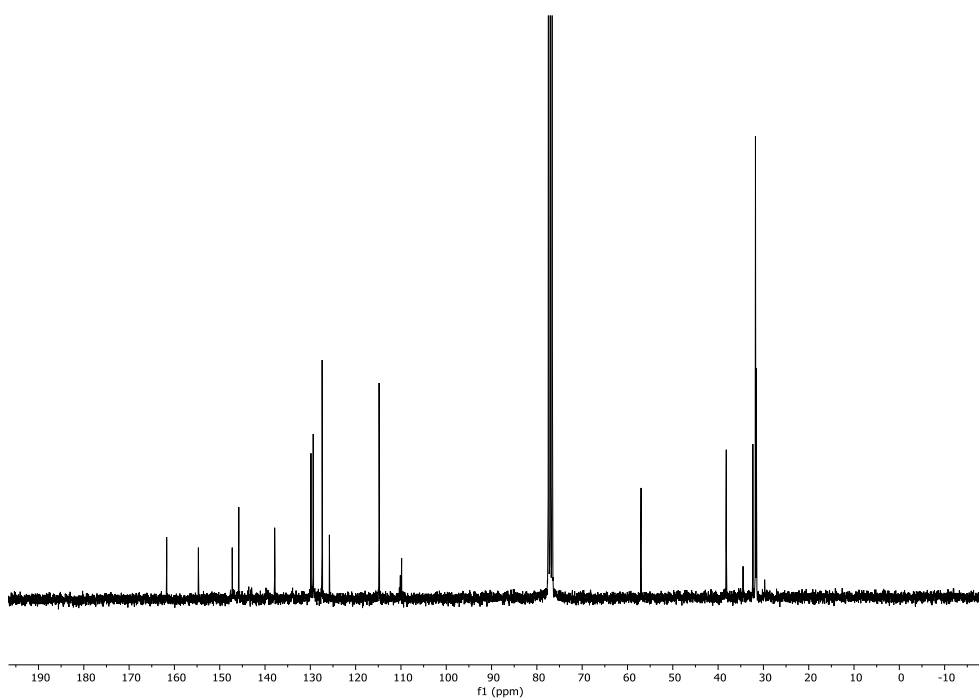

### $^{19}\text{F}$ NMR spectrum of 3e

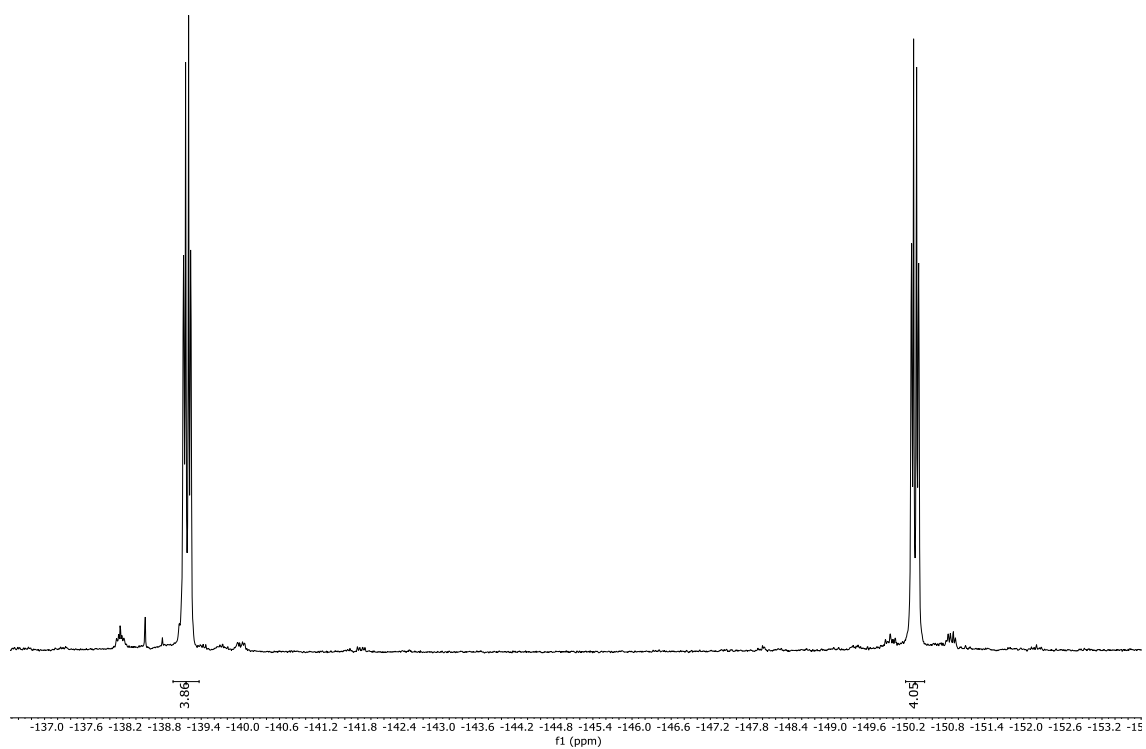

### Mass spectrum of 3e

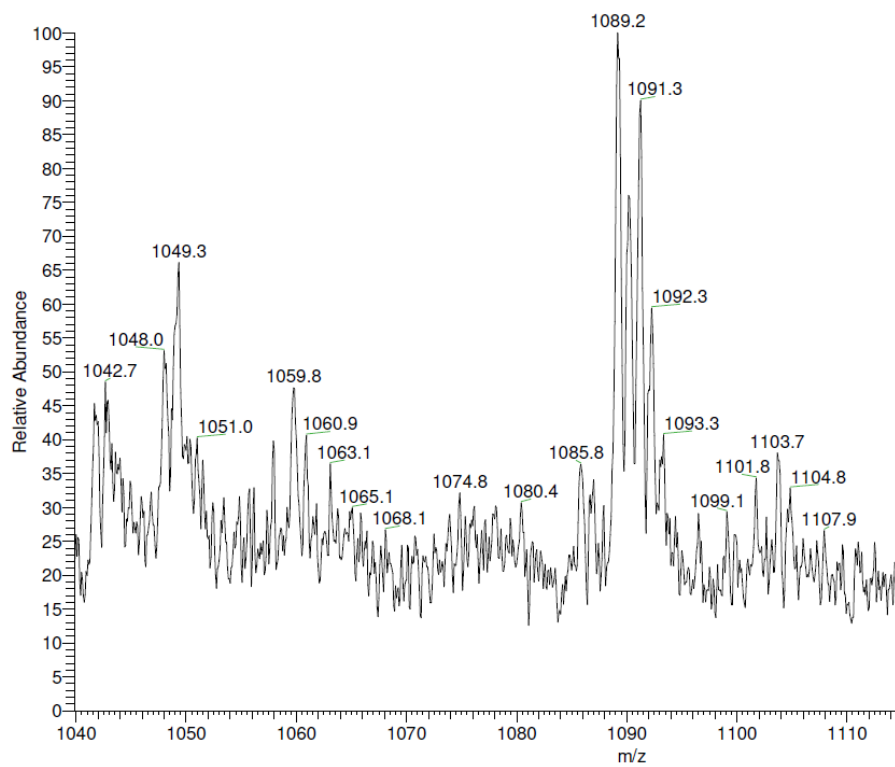

## UV-vis and fluorescence spectra of 3e

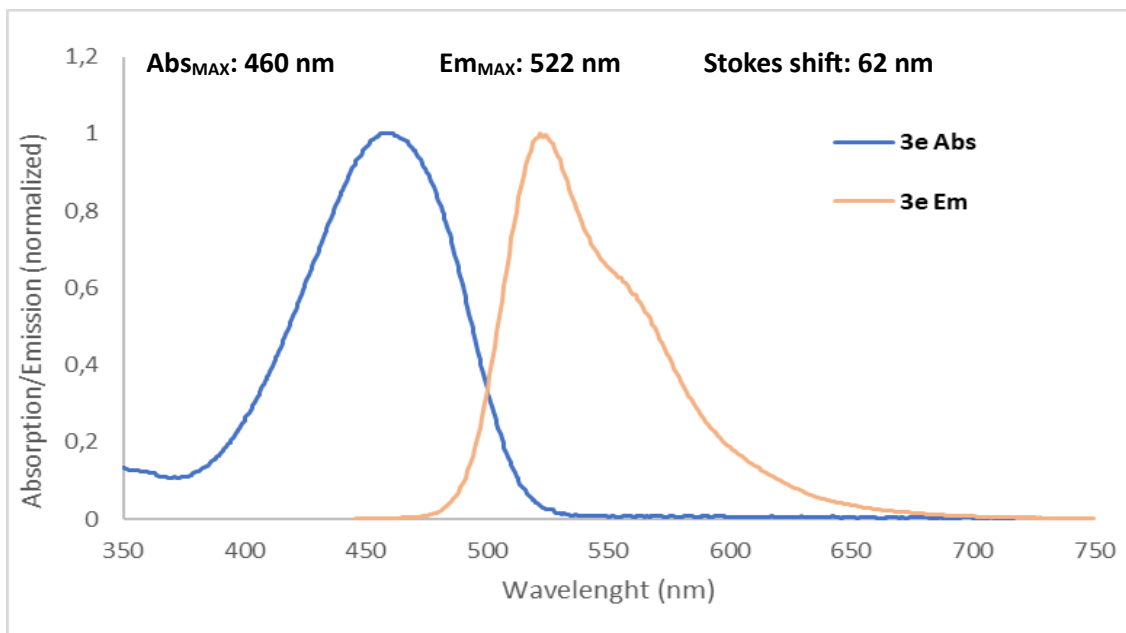

## Compound 3f

### <sup>1</sup>H NMR spectrum of 3f

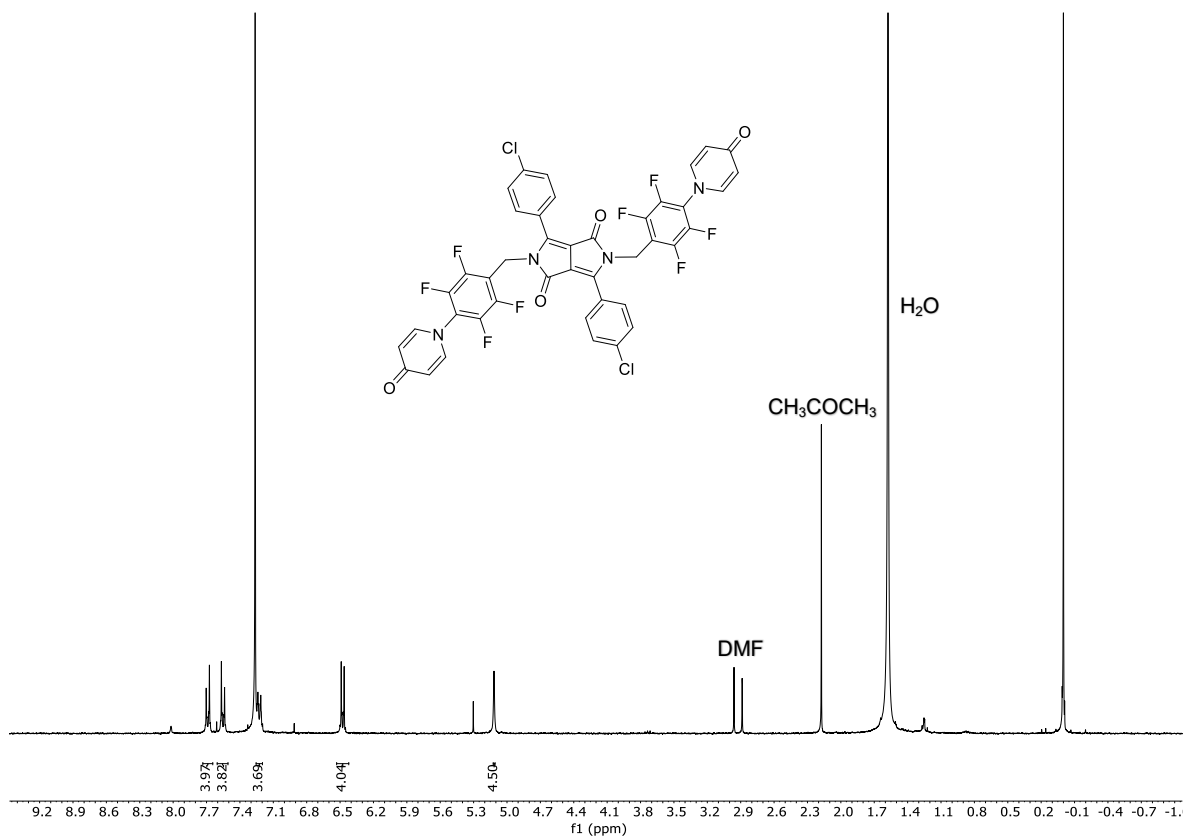

### <sup>19</sup>F NMR spectrum of 3f

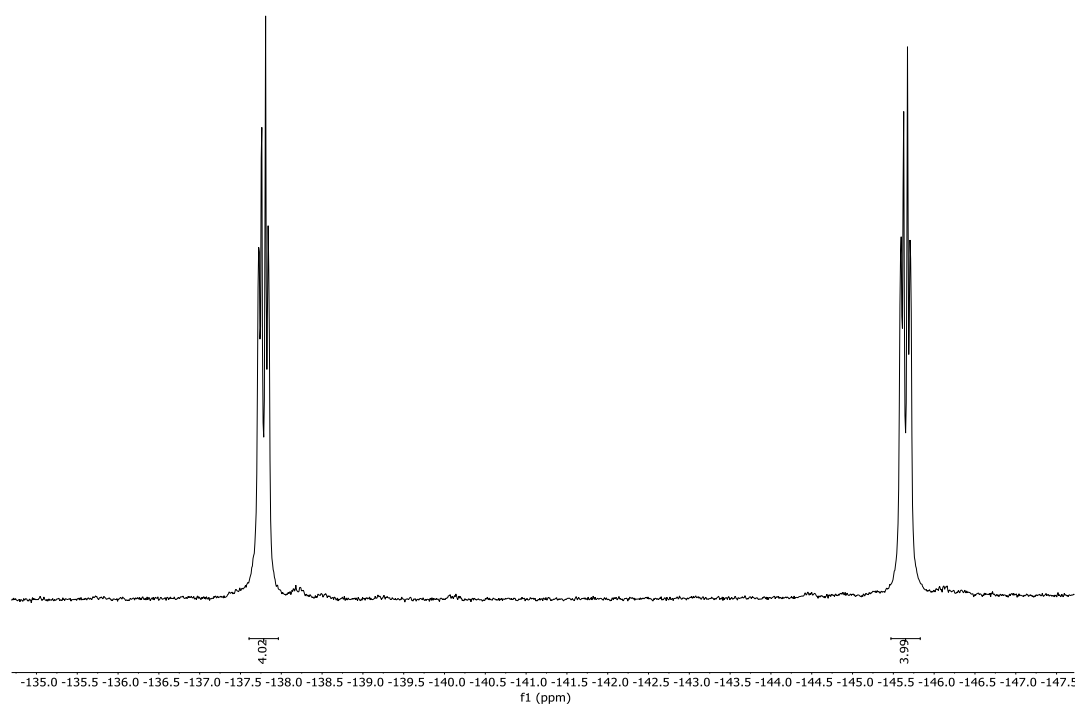

### Mass spectrum of 3f

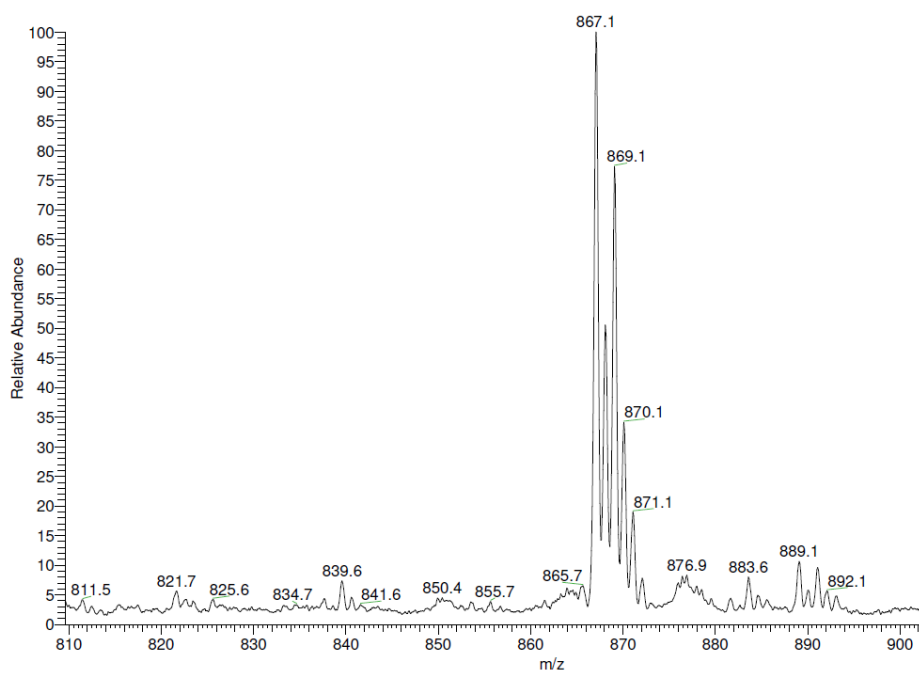

## UV-vis and fluorescence spectra of 3f

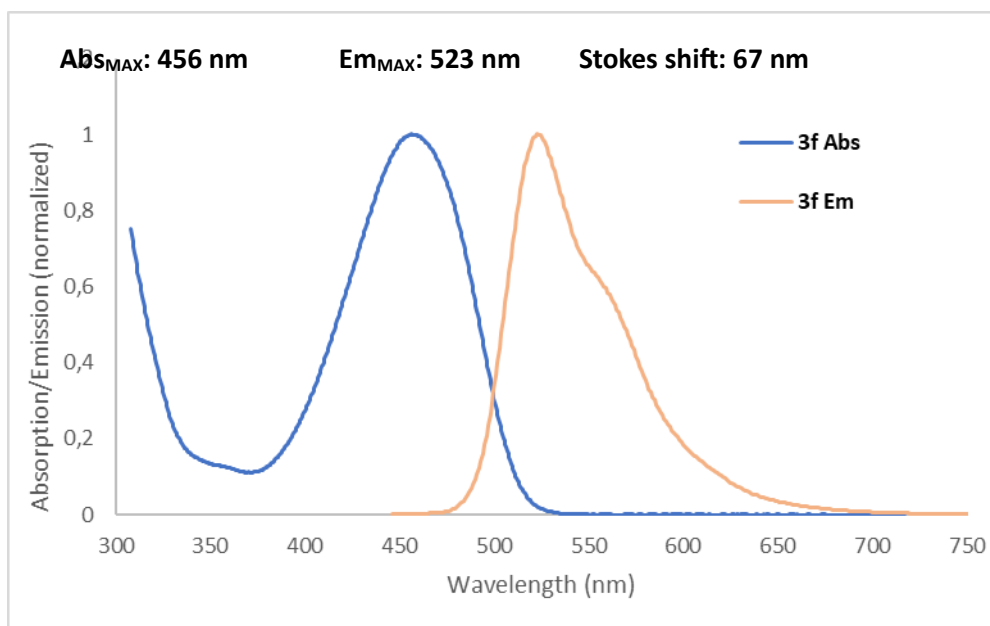

## Compound 4f

### <sup>1</sup>H NMR spectrum of 4f

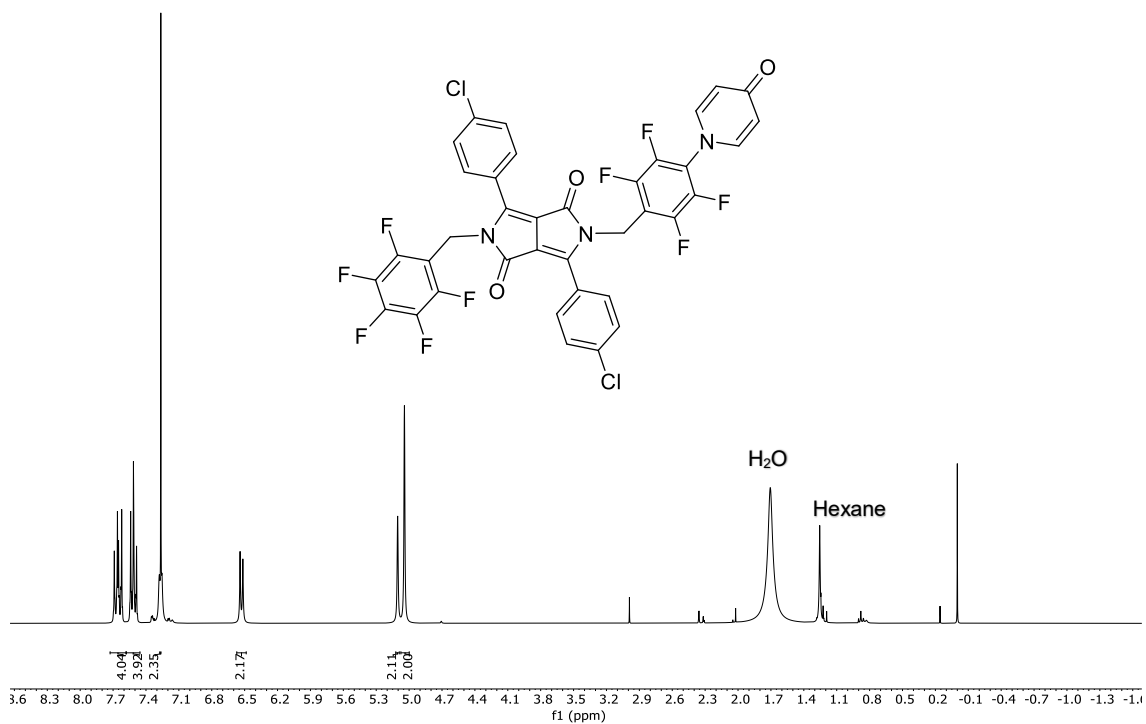

**$^{13}\text{C}$  NMR spectrum of 4f**

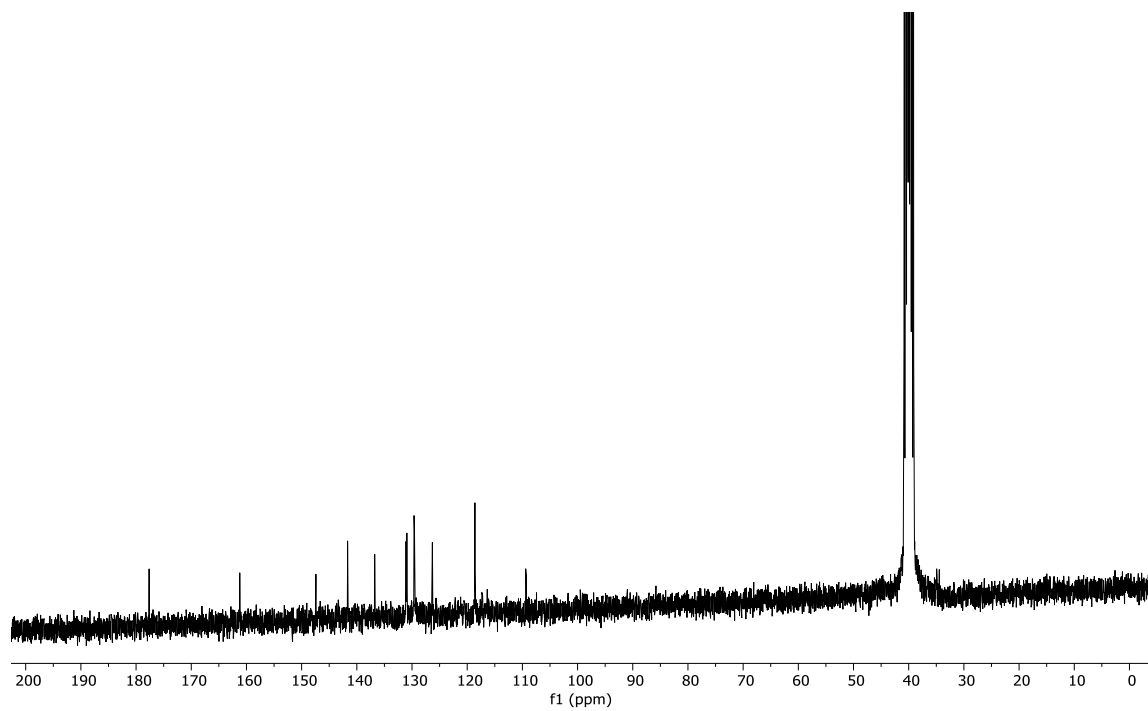

**$^{19}\text{F}$  NMR spectrum of 4f**

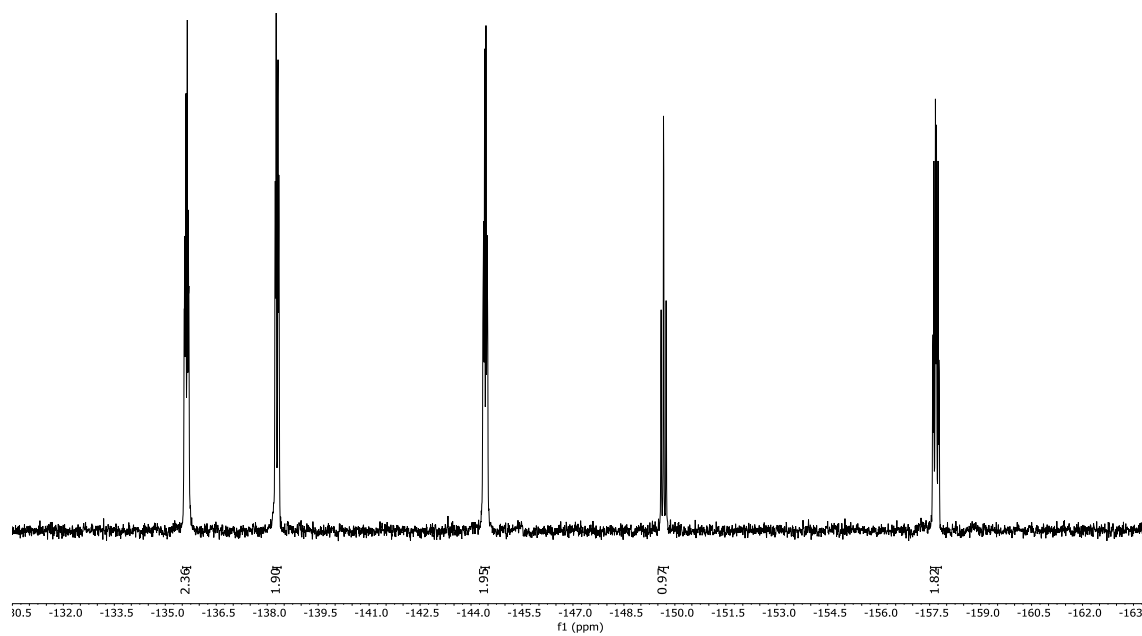

## Mass spectrum of 4f

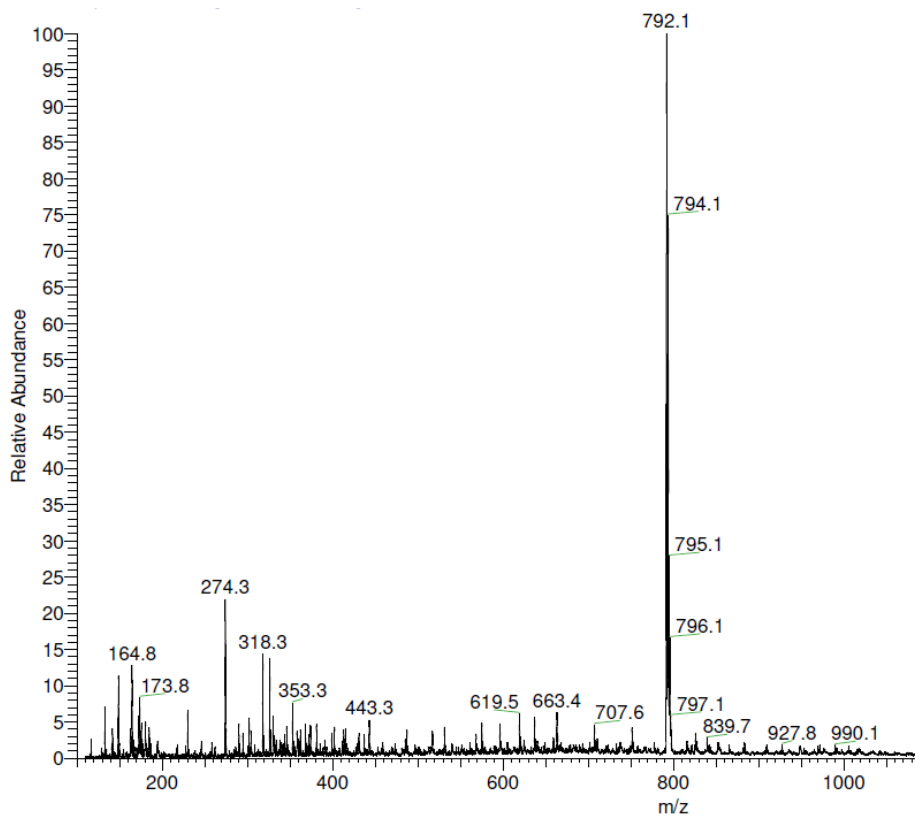

## UV-vis and fluorescence spectra of 4f

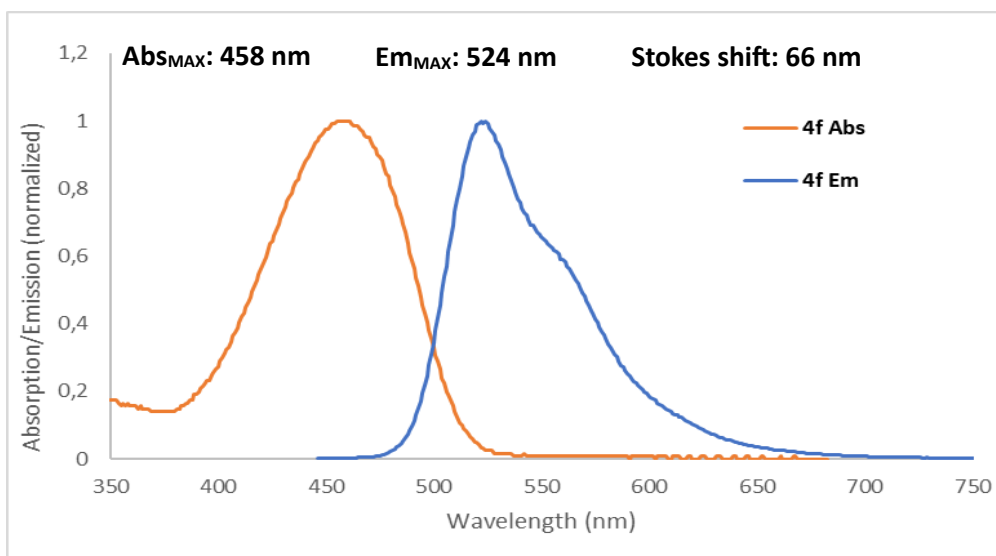

Supplement: Additional file 1 [file 1860-5397-20-169-S1.pdf]
